# Supplementary material for: Contrasting patterns of evolutionary constraint and novelty revealed by comparative sperm proteomic analysis in Lepidoptera
Source: PubMed Central journal article supplement (PMC5712127; doi:10.1186/s12864-017-4293-2), 2017-12-02
Supplement: 12864_2017_4293_MOESM4_ESM.pdf [file 12864_2017_4293_MOESM4_ESM.pdf]

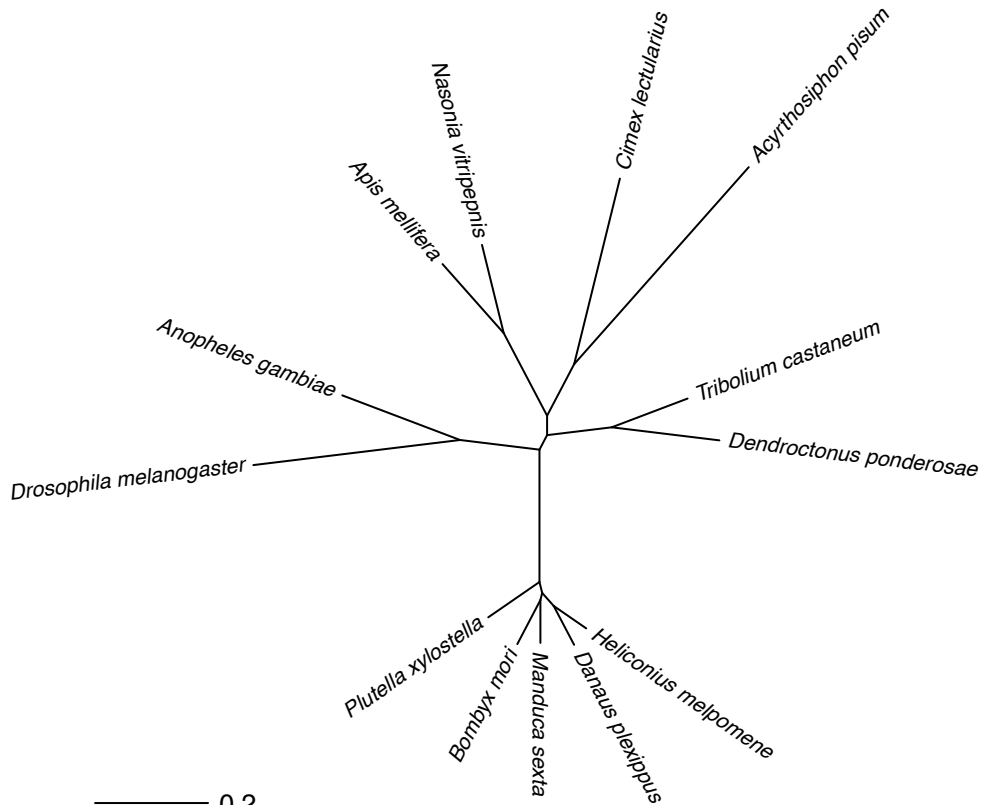

Additional File 4. Phylogenetic relationships among 13 insect taxa used for comparative genomic analysis in this study. The scale bar represents expected amino acid substitutions per site.
